# Supplementary material
Source: publisher figshare collection journal article supplement (https://acs.figshare.com/ndownloader/files/11922026)
Supplement: Supplementary file 1 [file 11922026]

data_I
_chemical_name_systematic               ?
_chemical_name_common                   ?
_chemical_formula_moiety                ?
_chemical_formula_sum                   'C15 H13 N O3'
_chemical_formula_iupac                 ?
_chemical_formula_weight                255.26

_chemical_melting_point                 ?

_space_group_crystal_system             orthorhombic
_space_group_name_H-M_alt               'P b c a'
_space_group_name_Hall                  '-P 2ac 2ab'
loop_
    _space_group_symop_operation_xyz
    'x, y, z'
    '-x+1/2, -y, z+1/2'
    '-x, y+1/2, -z+1/2'
    'x+1/2, -y+1/2, -z'
    '-x, -y, -z'
    'x-1/2, y, -z-1/2'
    'x, -y-1/2, z-1/2'
    '-x-1/2, y-1/2, z'

_cell_length_a                          12.7547(17)
_cell_length_b                          11.3387(15)
_cell_length_c                          16.800(2)
_cell_angle_alpha                       90
_cell_angle_beta                        90
_cell_angle_gamma                       90
_cell_volume                            2429.6(6)
_cell_formula_units_Z                   8
_cell_measurement_reflns_used           1348
_cell_measurement_theta_min             2.4246
_cell_measurement_theta_max             20.9203
_cell_measurement_temperature           173

_exptl_crystal_description              prismatic
_exptl_crystal_colour                   colourless
_exptl_crystal_size_max                 0.200
_exptl_crystal_size_mid                 0.200
_exptl_crystal_size_min                 0.100
_exptl_crystal_density_diffrn           1.396
_exptl_crystal_density_meas             ?
_exptl_crystal_density_method           'not measured'
_exptl_crystal_F_000                    1072

_exptl_absorpt_coefficient_mu           0.098
_exptl_absorpt_correction_type          multi-scan
_exptl_absorpt_process_details          
;
;
_exptl_absorpt_correction_T_min         0.94
_exptl_absorpt_correction_T_max         0.99

_exptl_special_details                  
;
; 

_diffrn_ambient_temperature             173

_diffrn_source                          ?
_diffrn_source_type                     ?

_diffrn_radiation_type                  ?
_diffrn_radiation_wavelength            0.71073
_diffrn_radiation_monochromator         ?

_diffrn_measurement_device_type         goniometer
_diffrn_measurement_method              ?

_diffrn_detector_area_resol_mean        8.3333

_diffrn_reflns_number                   13062
_diffrn_reflns_av_R_equivalents         0.0577
_diffrn_reflns_av_unetI/netI            0.0450
_diffrn_reflns_theta_min                2.425
_diffrn_reflns_theta_max                27.450
_diffrn_reflns_theta_full               27.450
_diffrn_measured_fraction_theta_max     0.994
_diffrn_measured_fraction_theta_full    0.994
_diffrn_reflns_limit_h_min              -14
_diffrn_reflns_limit_h_max              16
_diffrn_reflns_limit_k_min              -14
_diffrn_reflns_limit_k_max              14
_diffrn_reflns_limit_l_min              -15
_diffrn_reflns_limit_l_max              21

_refine_special_details                 
;
;

_reflns_number_total                    2758
_reflns_number_gt                       1797
_reflns_threshold_expression            'I > 2\s(I)'

_refine_ls_structure_factor_coef        Fsqd
_refine_ls_matrix_type                  full
_refine_ls_R_factor_all                 0.0800
_refine_ls_R_factor_gt                  0.0450
_refine_ls_wR_factor_gt                 0.1001
_refine_ls_wR_factor_ref                0.1121
_refine_ls_goodness_of_fit_ref          0.968
_refine_ls_restrained_S_all             0.968
_refine_ls_number_reflns                2758
_refine_ls_number_parameters            173
_refine_ls_number_restraints            0
_refine_ls_hydrogen_treatment           constr
_refine_ls_weighting_scheme             calc
_refine_ls_weighting_details            
    'w=1/[\s^2^(Fo^2^)+(0.0518P)^2^+0.2560P] where P=(Fo^2^+2Fc^2^)/3'

_atom_sites_solution_hydrogens          geom
_atom_sites_solution_primary            direct
_atom_sites_solution_secondary          difmap

_refine_ls_shift/su_max                 0.000
_refine_ls_shift/su_mean                0.000
_refine_diff_density_max                0.214
_refine_diff_density_min                -0.203
_refine_ls_extinction_method            none
_refine_ls_extinction_coef              ?

loop_
    _atom_type_symbol
    _atom_type_description
    _atom_type_scat_dispersion_real
    _atom_type_scat_dispersion_imag
    _atom_type_scat_source
    C C 0.0033 0.0016 'International Tables Vol C Tables 4.2.6.8 and 6.1.1.4'
    H H 0.0000 0.0000 'International Tables Vol C Tables 4.2.6.8 and 6.1.1.4'
    N N 0.0061 0.0033 'International Tables Vol C Tables 4.2.6.8 and 6.1.1.4'
    O O 0.0106 0.0060 'International Tables Vol C Tables 4.2.6.8 and 6.1.1.4'

_computing_data_collection              ?
_computing_cell_refinement              'SAINT V8.34A (Bruker AXS Inc., 2013)'
_computing_data_reduction               'SAINT V8.34A (Bruker AXS Inc., 2013)'
_computing_structure_solution           ?
_computing_structure_refinement         'SHELXL-2014/7 (Sheldrick, 2014)'
_computing_molecular_graphics           ?
_computing_publication_material         ?

loop_
    _atom_site_type_symbol
    _atom_site_label
    _atom_site_fract_x
    _atom_site_fract_y
    _atom_site_fract_z
    _atom_site_U_iso_or_equiv
    _atom_site_adp_type
    _atom_site_calc_flag
    _atom_site_refinement_flags_adp
    _atom_site_refinement_flags_occupancy
    _atom_site_refinement_flags_posn
    _atom_site_occupancy
    _atom_site_disorder_assembly
    _atom_site_disorder_group
    C C1 0.97790(13) 0.15265(14) 0.63102(10) 0.0303(4) Uani d . . . 1 . .
    C C2 1.03421(13) 0.19314(15) 0.70478(10) 0.0305(4) Uani d . . . 1 . .
    H H2 1.0988 0.1457 0.7154 0.037 Uiso calc U . R 1 . .
    C C3 1.05663(15) 0.32913(16) 0.70647(11) 0.0385(5) Uani d . . . 1 . .
    H H3 1.1242 0.354 0.6814 0.046 Uiso calc U . R 1 . .
    C C4 0.96008(16) 0.38902(15) 0.67445(12) 0.0415(5) Uani d . . . 1 . .
    H H4 0.9522 0.4264 0.6242 0.05 Uiso calc U . R 1 . .
    C C5 0.88907(15) 0.37867(14) 0.73069(11) 0.0393(5) Uani d . . . 1 . .
    H H5 0.8189 0.4067 0.7288 0.047 Uiso calc U . R 1 . .
    C C6 0.94027(14) 0.31372(16) 0.79901(10) 0.0345(4) Uani d . . . 1 . .
    C C7 0.95405(13) 0.18182(14) 0.77168(10) 0.0296(4) Uani d . . . 1 . .
    H H7 0.9813 0.1316 0.816 0.036 Uiso calc U . R 1 . .
    C C8 0.85873(13) 0.12785(13) 0.73403(10) 0.0283(4) Uani d . . . 1 . .
    C C9 0.89953(19) 0.33251(19) 0.88123(12) 0.0540(6) Uani d . . . 1 . .
    H H9A 0.9448 0.2916 0.9194 0.081 Uiso calc U . R 1 . .
    H H9B 0.8281 0.3012 0.8851 0.081 Uiso calc U . R 1 . .
    H H9C 0.8989 0.4171 0.8932 0.081 Uiso calc U . R 1 . .
    C C10 0.80057(12) 0.07767(14) 0.59559(10) 0.0274(4) Uani d . . . 1 . .
    C C11 0.71084(14) 0.14374(16) 0.58298(11) 0.0368(4) Uani d . . . 1 . .
    H H11 0.6978 0.2126 0.6136 0.044 Uiso calc U . R 1 . .
    C C12 0.64054(14) 0.10804(17) 0.52519(12) 0.0430(5) Uani d . . . 1 . .
    H H12 0.5787 0.1526 0.5159 0.052 Uiso calc U . R 1 . .
    C C13 0.65991(15) 0.00772(18) 0.48090(11) 0.0422(5) Uani d . . . 1 . .
    H H13 0.6115 -0.0163 0.4411 0.051 Uiso calc U . R 1 . .
    C C14 0.74918(15) -0.05748(16) 0.49421(11) 0.0392(5) Uani d . . . 1 . .
    H H14 0.7621 -0.1266 0.4638 0.047 Uiso calc U . R 1 . .
    C C15 0.82002(14) -0.02260(15) 0.55172(10) 0.0336(4) Uani d . . . 1 . .
    H H15 0.8817 -0.0674 0.561 0.04 Uiso calc U . R 1 . .
    N N1 0.87703(10) 0.11666(11) 0.65272(8) 0.0272(3) Uani d . . . 1 . .
    O O1 0.77787(10) 0.09922(11) 0.76675(7) 0.0419(3) Uani d . . . 1 . .
    O O2 1.01052(9) 0.15308(12) 0.56362(7) 0.0432(4) Uani d . . . 1 . .
    O O3 1.04823(10) 0.35185(11) 0.79013(7) 0.0431(4) Uani d . . . 1 . .

loop_
    _atom_site_aniso_label
    _atom_site_aniso_U_11
    _atom_site_aniso_U_22
    _atom_site_aniso_U_33
    _atom_site_aniso_U_12
    _atom_site_aniso_U_13
    _atom_site_aniso_U_23
    C1 0.0305(9) 0.0259(9) 0.0345(10) 0.0030(7) 0.0026(8) -0.0040(7)
    C2 0.0272(9) 0.0299(9) 0.0343(10) 0.0022(7) -0.0032(7) -0.0033(7)
    C3 0.0417(11) 0.0392(11) 0.0346(10) -0.0141(8) 0.0019(8) -0.0049(8)
    C4 0.0590(13) 0.0228(10) 0.0426(11) -0.0053(9) -0.0025(10) 0.0035(8)
    C5 0.0471(11) 0.0212(9) 0.0496(12) 0.0048(8) -0.0027(10) -0.0032(8)
    C6 0.0382(10) 0.0303(10) 0.0351(10) -0.0030(8) -0.0002(8) -0.0064(8)
    C7 0.0335(10) 0.0260(9) 0.0294(9) 0.0031(7) -0.0058(8) 0.0003(7)
    C8 0.0340(9) 0.0215(8) 0.0294(9) 0.0016(7) -0.0011(8) 0.0007(7)
    C9 0.0673(14) 0.0527(13) 0.0419(12) -0.0076(11) 0.0077(10) -0.0155(10)
    C10 0.0299(9) 0.0259(9) 0.0264(8) -0.0036(7) -0.0024(7) 0.0024(7)
    C11 0.0385(10) 0.0304(10) 0.0415(11) 0.0025(8) -0.0036(9) -0.0009(8)
    C12 0.0361(10) 0.0442(12) 0.0487(12) 0.0050(9) -0.0119(9) 0.0072(9)
    C13 0.0446(12) 0.0480(12) 0.0339(10) -0.0091(9) -0.0153(9) 0.0047(9)
    C14 0.0472(11) 0.0355(10) 0.0349(10) -0.0026(9) -0.0084(9) -0.0065(8)
    C15 0.0355(10) 0.0307(10) 0.0344(9) 0.0024(8) -0.0051(8) -0.0028(8)
    N1 0.0293(8) 0.0237(7) 0.0285(7) -0.0007(6) -0.0016(6) -0.0024(6)
    O1 0.0400(7) 0.0482(8) 0.0373(7) -0.0118(6) 0.0068(6) -0.0017(6)
    O2 0.0419(8) 0.0532(9) 0.0346(7) -0.0103(6) 0.0093(6) -0.0102(6)
    O3 0.0447(8) 0.0442(8) 0.0405(8) -0.0135(6) -0.0030(6) -0.0107(6)

_geom_special_details                   
;
All esds (except the esd in the dihedral angle between two l.s. planes)
are estimated using the full covariance matrix.  The cell esds are taken
into account individually in the estimation of esds in distances, angles
and torsion angles; correlations between esds in cell parameters are only
used when they are defined by crystal symmetry.  An approximate (isotropic)
treatment of cell esds is used for estimating esds involving l.s. planes.
;

loop_
    _geom_bond_atom_site_label_1
    _geom_bond_atom_site_label_2
    _geom_bond_site_symmetry_2
    _geom_bond_distance
    _geom_bond_publ_flag
    C1 O2 . 1.206(2) ?
    C1 N1 . 1.398(2) ?
    C1 C2 . 1.504(2) ?
    C2 C7 . 1.525(2) ?
    C2 C3 . 1.569(2) ?
    C2 H2 . 1.0 ?
    C3 O3 . 1.433(2) ?
    C3 C4 . 1.506(3) ?
    C3 H3 . 1.0 ?
    C4 C5 . 1.314(3) ?
    C4 H4 . 0.95 ?
    C5 C6 . 1.512(3) ?
    C5 H5 . 0.95 ?
    C6 O3 . 1.451(2) ?
    C6 C9 . 1.491(3) ?
    C6 C7 . 1.574(2) ?
    C7 C8 . 1.501(2) ?
    C7 H7 . 1.0 ?
    C8 O1 . 1.2130(19) ?
    C8 N1 . 1.392(2) ?
    C9 H9A . 0.98 ?
    C9 H9B . 0.98 ?
    C9 H9C . 0.98 ?
    C10 C15 . 1.377(2) ?
    C10 C11 . 1.384(2) ?
    C10 N1 . 1.438(2) ?
    C11 C12 . 1.382(2) ?
    C11 H11 . 0.95 ?
    C12 C13 . 1.382(3) ?
    C12 H12 . 0.95 ?
    C13 C14 . 1.376(3) ?
    C13 H13 . 0.95 ?
    C14 C15 . 1.381(2) ?
    C14 H14 . 0.95 ?
    C15 H15 . 0.95 ?

loop_
    _geom_angle_atom_site_label_1
    _geom_angle_atom_site_label_2
    _geom_angle_atom_site_label_3
    _geom_angle_site_symmetry_1
    _geom_angle_site_symmetry_3
    _geom_angle
    _geom_angle_publ_flag
    O2 C1 N1 . . 124.29(16) ?
    O2 C1 C2 . . 127.40(16) ?
    N1 C1 C2 . . 108.28(14) ?
    C1 C2 C7 . . 105.15(14) ?
    C1 C2 C3 . . 113.70(14) ?
    C7 C2 C3 . . 101.05(13) ?
    C1 C2 H2 . . 112.1 ?
    C7 C2 H2 . . 112.1 ?
    C3 C2 H2 . . 112.1 ?
    O3 C3 C4 . . 102.02(15) ?
    O3 C3 C2 . . 100.41(13) ?
    C4 C3 C2 . . 106.73(14) ?
    O3 C3 H3 . . 115.3 ?
    C4 C3 H3 . . 115.3 ?
    C2 C3 H3 . . 115.3 ?
    C5 C4 C3 . . 105.46(16) ?
    C5 C4 H4 . . 127.3 ?
    C3 C4 H4 . . 127.3 ?
    C4 C5 C6 . . 106.96(17) ?
    C4 C5 H5 . . 126.5 ?
    C6 C5 H5 . . 126.5 ?
    O3 C6 C9 . . 112.55(15) ?
    O3 C6 C5 . . 100.76(14) ?
    C9 C6 C5 . . 118.88(17) ?
    O3 C6 C7 . . 98.46(13) ?
    C9 C6 C7 . . 116.41(16) ?
    C5 C6 C7 . . 106.83(14) ?
    C8 C7 C2 . . 105.48(13) ?
    C8 C7 C6 . . 114.82(14) ?
    C2 C7 C6 . . 102.12(13) ?
    C8 C7 H7 . . 111.3 ?
    C2 C7 H7 . . 111.3 ?
    C6 C7 H7 . . 111.3 ?
    O1 C8 N1 . . 124.27(15) ?
    O1 C8 C7 . . 127.36(15) ?
    N1 C8 C7 . . 108.36(14) ?
    C6 C9 H9A . . 109.5 ?
    C6 C9 H9B . . 109.5 ?
    H9A C9 H9B . . 109.5 ?
    C6 C9 H9C . . 109.5 ?
    H9A C9 H9C . . 109.5 ?
    H9B C9 H9C . . 109.5 ?
    C15 C10 C11 . . 120.91(15) ?
    C15 C10 N1 . . 119.26(15) ?
    C11 C10 N1 . . 119.77(15) ?
    C12 C11 C10 . . 119.04(17) ?
    C12 C11 H11 . . 120.5 ?
    C10 C11 H11 . . 120.5 ?
    C11 C12 C13 . . 120.23(17) ?
    C11 C12 H12 . . 119.9 ?
    C13 C12 H12 . . 119.9 ?
    C14 C13 C12 . . 120.19(17) ?
    C14 C13 H13 . . 119.9 ?
    C12 C13 H13 . . 119.9 ?
    C13 C14 C15 . . 120.10(17) ?
    C13 C14 H14 . . 120.0 ?
    C15 C14 H14 . . 120.0 ?
    C10 C15 C14 . . 119.54(17) ?
    C10 C15 H15 . . 120.2 ?
    C14 C15 H15 . . 120.2 ?
    C8 N1 C1 . . 112.56(13) ?
    C8 N1 C10 . . 124.71(13) ?
    C1 N1 C10 . . 122.67(14) ?
    C3 O3 C6 . . 96.79(12) ?

loop_
    _geom_torsion_atom_site_label_1
    _geom_torsion_atom_site_label_2
    _geom_torsion_atom_site_label_3
    _geom_torsion_atom_site_label_4
    _geom_torsion_site_symmetry_1
    _geom_torsion_site_symmetry_2
    _geom_torsion_site_symmetry_3
    _geom_torsion_site_symmetry_4
    _geom_torsion
    _geom_torsion_publ_flag
    O2 C1 C2 C7 . . . . 175.77(17) ?
    N1 C1 C2 C7 . . . . -2.25(18) ?
    O2 C1 C2 C3 . . . . 66.2(2) ?
    N1 C1 C2 C3 . . . . -111.87(16) ?
    C1 C2 C3 O3 . . . . 146.92(14) ?
    C7 C2 C3 O3 . . . . 34.80(16) ?
    C1 C2 C3 C4 . . . . 40.9(2) ?
    C7 C2 C3 C4 . . . . -71.24(16) ?
    O3 C3 C4 C5 . . . . -32.36(18) ?
    C2 C3 C4 C5 . . . . 72.53(18) ?
    C3 C4 C5 C6 . . . . 0.70(19) ?
    C4 C5 C6 O3 . . . . 30.57(17) ?
    C4 C5 C6 C9 . . . . 153.98(17) ?
    C4 C5 C6 C7 . . . . -71.78(18) ?
    C1 C2 C7 C8 . . . . 3.76(17) ?
    C3 C2 C7 C8 . . . . 122.26(13) ?
    C1 C2 C7 C6 . . . . -116.57(14) ?
    C3 C2 C7 C6 . . . . 1.94(16) ?
    O3 C6 C7 C8 . . . . -150.99(14) ?
    C9 C6 C7 C8 . . . . 88.6(2) ?
    C5 C6 C7 C8 . . . . -46.98(19) ?
    O3 C6 C7 C2 . . . . -37.41(15) ?
    C9 C6 C7 C2 . . . . -157.86(16) ?
    C5 C6 C7 C2 . . . . 66.60(17) ?
    C2 C7 C8 O1 . . . . 176.80(16) ?
    C6 C7 C8 O1 . . . . -71.6(2) ?
    C2 C7 C8 N1 . . . . -4.07(17) ?
    C6 C7 C8 N1 . . . . 107.53(16) ?
    C15 C10 C11 C12 . . . . -0.3(3) ?
    N1 C10 C11 C12 . . . . 176.96(15) ?
    C10 C11 C12 C13 . . . . 0.1(3) ?
    C11 C12 C13 C14 . . . . 0.2(3) ?
    C12 C13 C14 C15 . . . . -0.3(3) ?
    C11 C10 C15 C14 . . . . 0.2(3) ?
    N1 C10 C15 C14 . . . . -177.04(15) ?
    C13 C14 C15 C10 . . . . 0.1(3) ?
    O1 C8 N1 C1 . . . . -178.01(15) ?
    C7 C8 N1 C1 . . . . 2.82(18) ?
    O1 C8 N1 C10 . . . . 4.6(2) ?
    C7 C8 N1 C10 . . . . -174.55(14) ?
    O2 C1 N1 C8 . . . . -178.41(16) ?
    C2 C1 N1 C8 . . . . -0.31(18) ?
    O2 C1 N1 C10 . . . . -1.0(3) ?
    C2 C1 N1 C10 . . . . 177.13(14) ?
    C15 C10 N1 C8 . . . . -119.43(17) ?
    C11 C10 N1 C8 . . . . 63.3(2) ?
    C15 C10 N1 C1 . . . . 63.5(2) ?
    C11 C10 N1 C1 . . . . -113.80(18) ?
    C4 C3 O3 C6 . . . . 49.58(15) ?
    C2 C3 O3 C6 . . . . -60.19(15) ?
    C9 C6 O3 C3 . . . . -176.15(16) ?
    C5 C6 O3 C3 . . . . -48.47(15) ?
    C7 C6 O3 C3 . . . . 60.57(14) ?
